# Supplementary figures and images for: Co-transcriptional R-loops are the main cause of estrogen-induced DNA damage
Source: eLife journal article supplement (doi:10.7554/elife.17548), 2016-08-23

Figure 3 - figure supplement 2

A

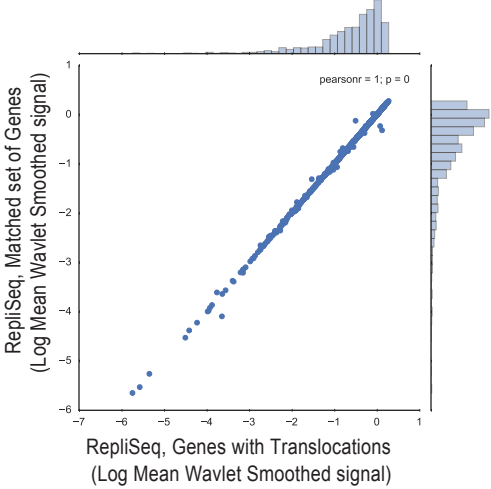

B

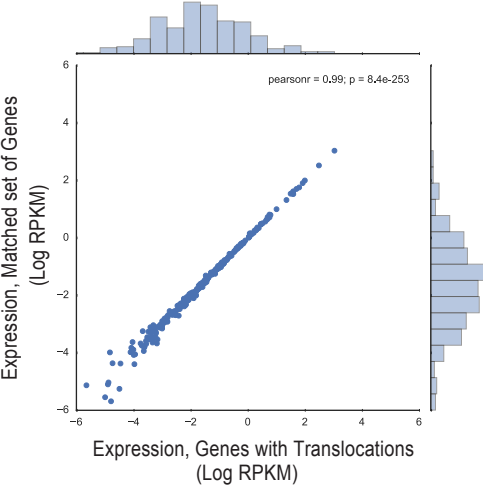

Supplement: supp [file elife-17548-supp-v1.zip]

Figure 1 - figure supplement 4

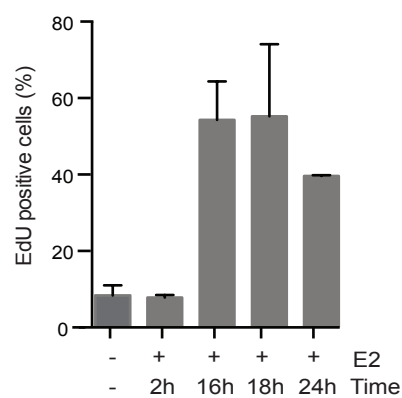

Supplement: supp [file elife-17548-supp-v1.zip]

Figure 4 - figure supplement 3

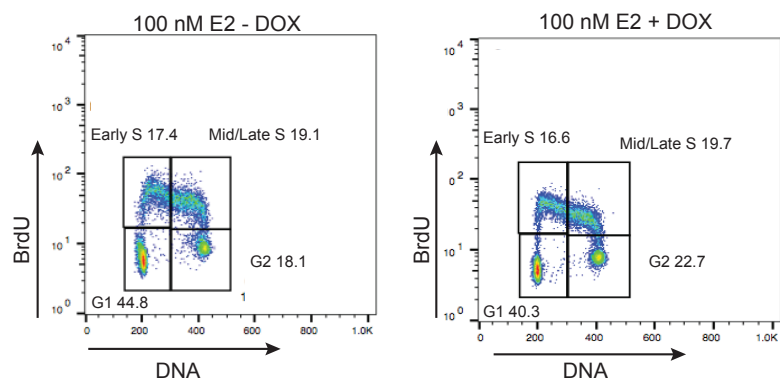

Supplement: supp [file elife-17548-supp-v1.zip]

Figure 1 - figure supplement 5

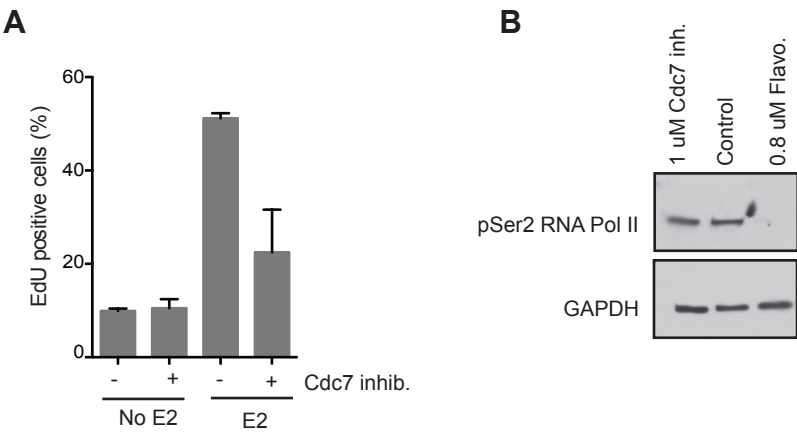

Supplement: supp [file elife-17548-supp-v1.zip]

Figure 4 - figure supplement 2

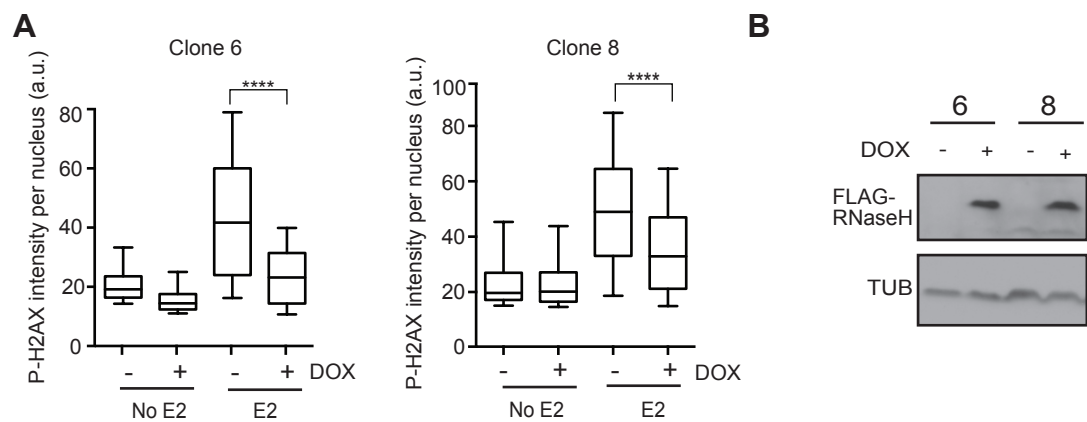

Supplement: supp [file elife-17548-supp-v1.zip]

Figure 4 - figure supplement 4

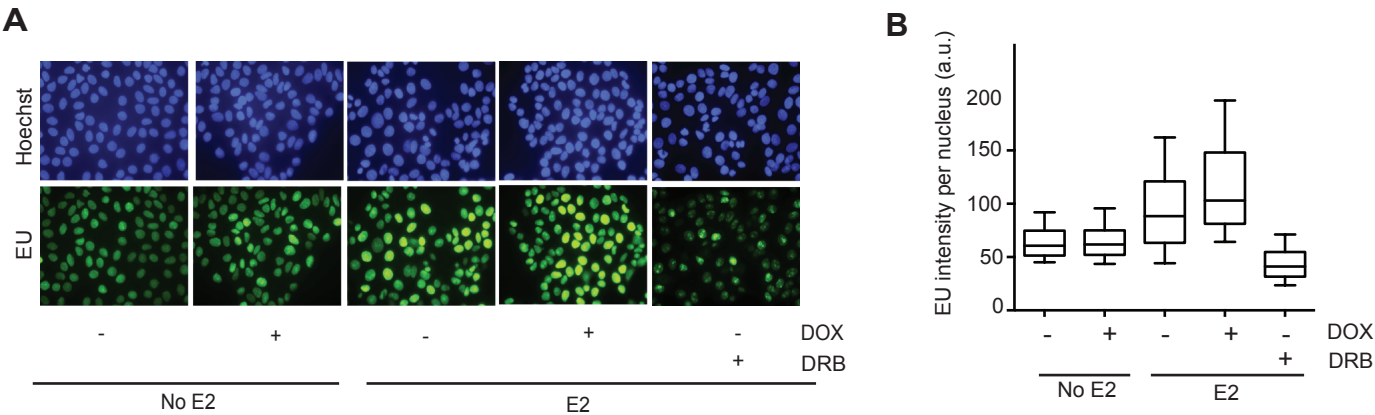

Supplement: supp [file elife-17548-supp-v1.zip]

Figure 2 - figure supplement 2

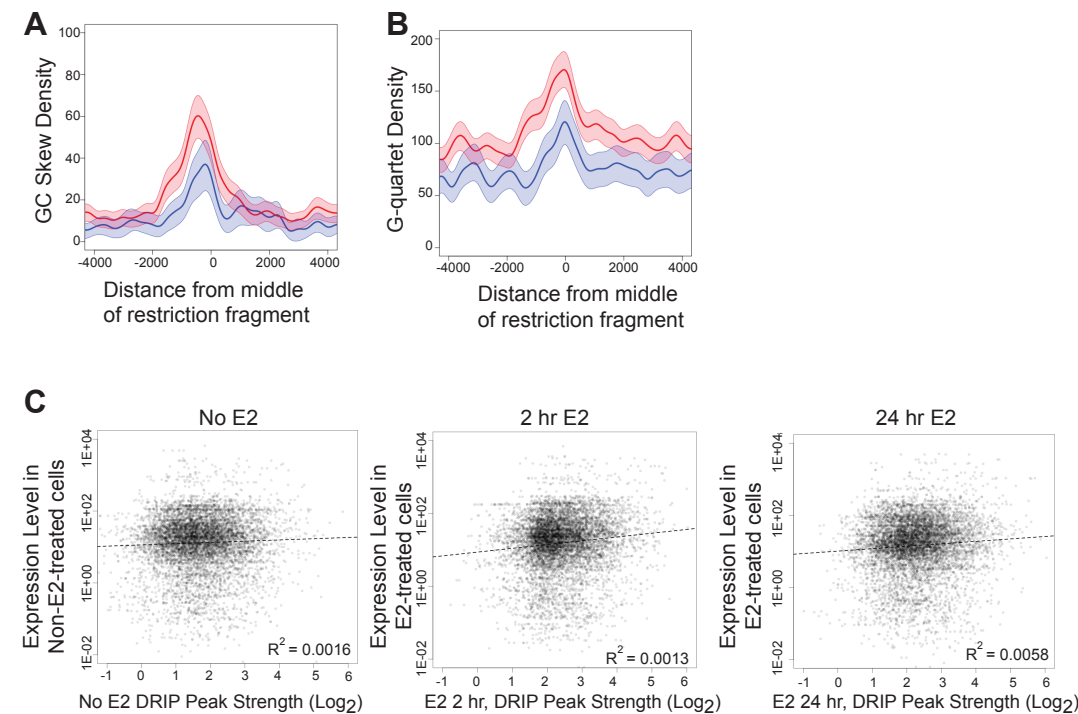

Supplement: supp [file elife-17548-supp-v1.zip]

Figure 4 - figure supplement 1

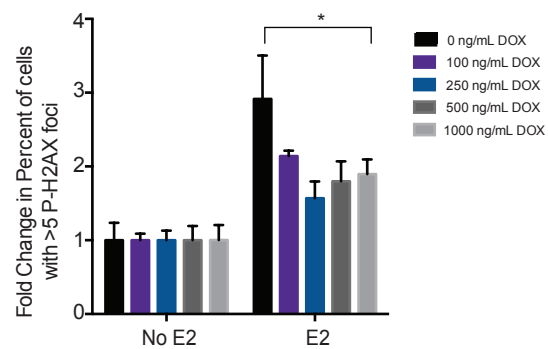

Supplement: supp [file elife-17548-supp-v1.zip]

**Figure 3 - figure supplement 3**

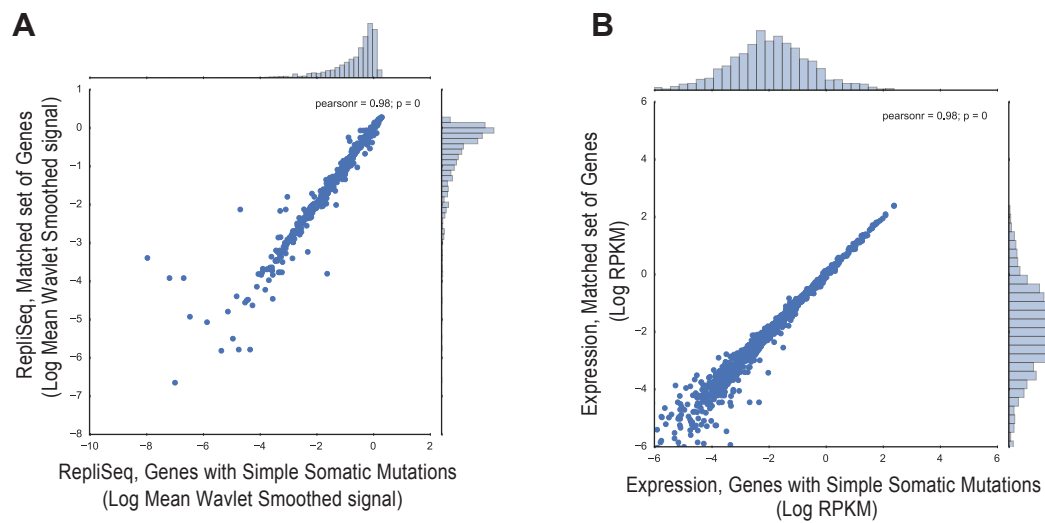

Supplement: supp [file elife-17548-supp-v1.zip]

Figure 1 - figure supplement 1

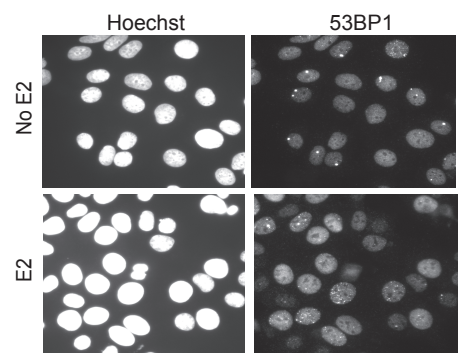

Supplement: supp [file elife-17548-supp-v1.zip]

Figure 2 - figure supplement 1

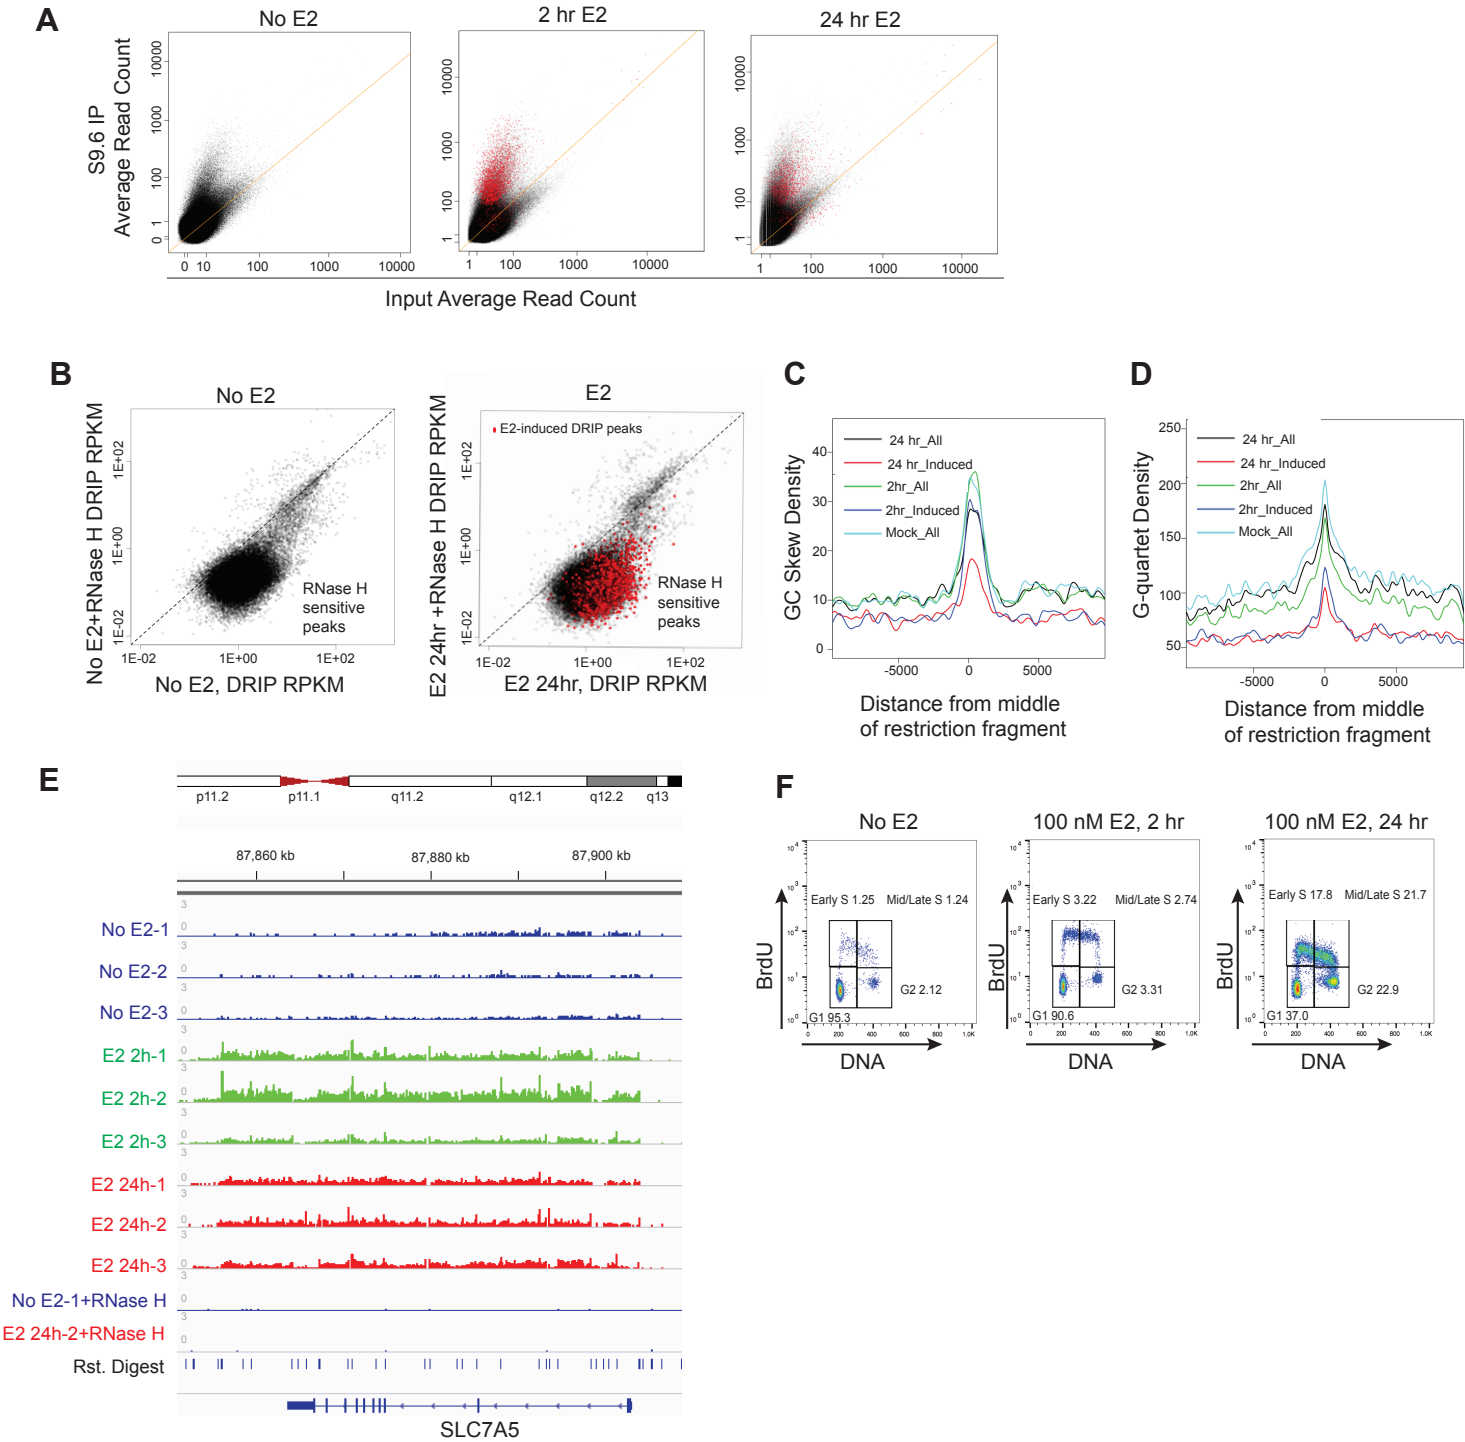

Supplement: supp [file elife-17548-supp-v1.zip]

Figure 1 - figure supplement 2

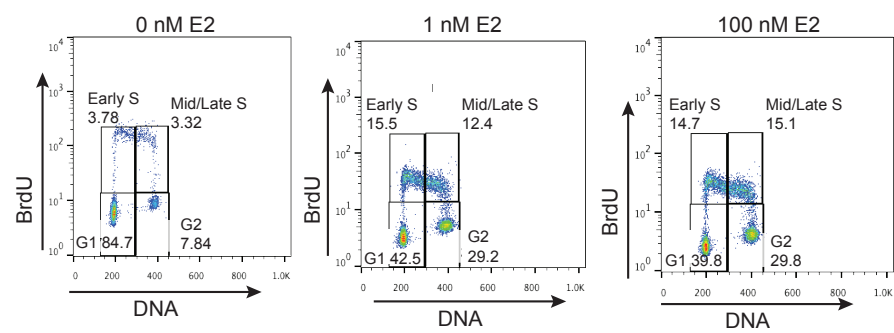

Supplement: supp [file elife-17548-supp-v1.zip]

Figure 3 - figure supplement 1

A

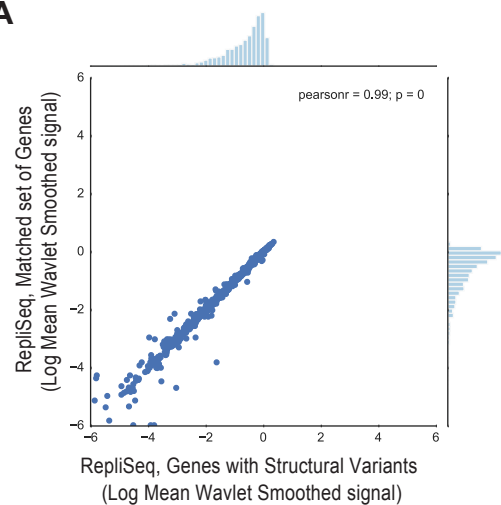

B

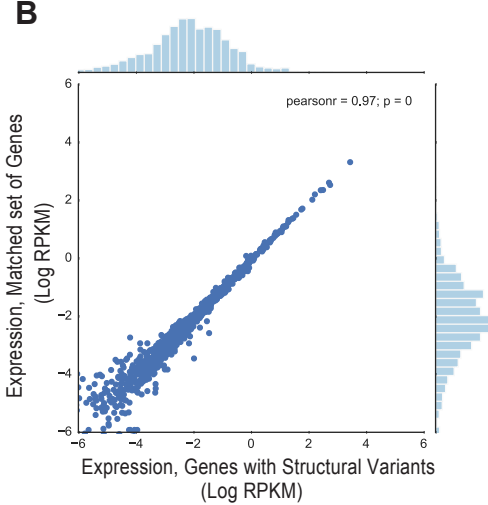

Supplement: supp [file elife-17548-supp-v1.zip]

Figure 5 - figure supplement 1

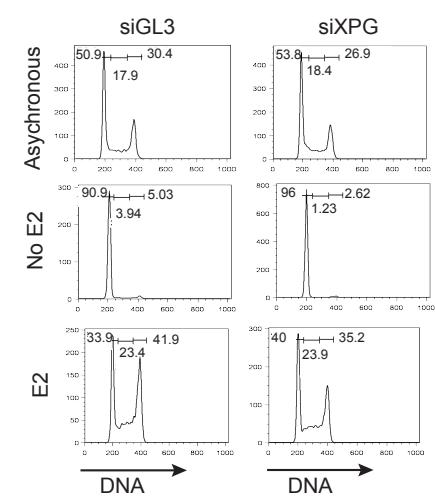

Supplement: supp [file elife-17548-supp-v1.zip]

**Figure 1 - figure supplement 6**

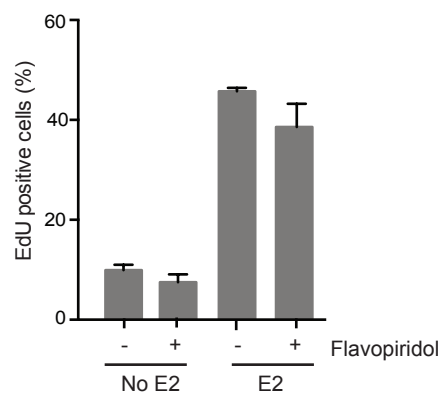

Supplement: supp [file elife-17548-supp-v1.zip]

Figure 1 - figure supplement 3

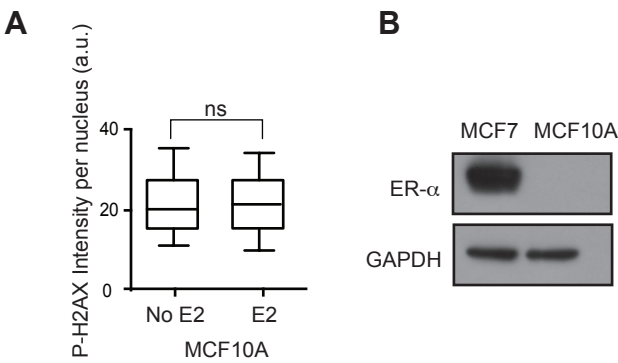

Supplement: supp [file elife-17548-supp-v1.zip]
